# Supplementary material for: Precise mapping of the transcription start sites of human microRNAs using DROSHA knockout cells
Source: PubMed Central journal article supplement (PMC5106785; doi:10.1186/s12864-016-3252-7), 2016-11-11

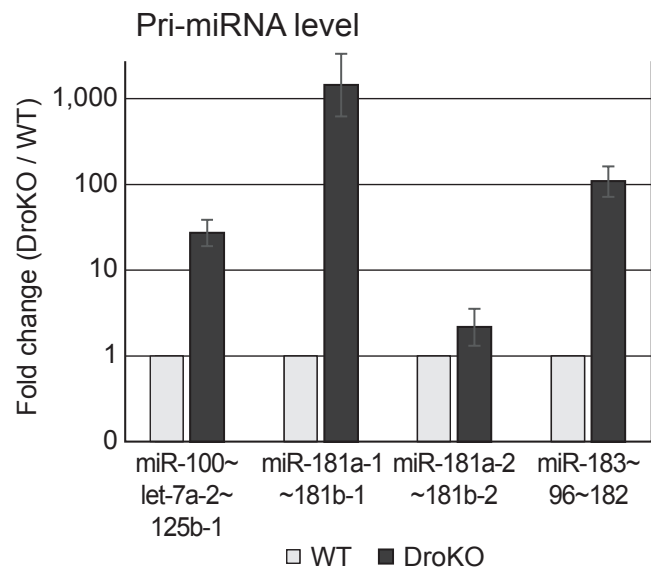

Supplement: 12864_2016_3252_MOESM1_ESM.pdf [file 12864_2016_3252_MOESM1_ESM.pdf]
