# Supplementary material for: Precise mapping of the transcription start sites of human microRNAs using DROSHA knockout cells
Source: PubMed Central journal article supplement (PMC5106785; doi:10.1186/s12864-016-3252-7), 2016-11-11

| Library                       | Wild-type     | <i>DROSHA</i> KO |                           |
|-------------------------------|---------------|------------------|---------------------------|
| Total reads                   | 198,937,194   | 196,007,170      |                           |
| Aligned 1 time                | 123,306,296   | 128,857,225      |                           |
| Aligned >1 times              | 63,811,001    | 55,447,581       |                           |
| Used for this study (MAPQ>10) | 137,085,295   | 139,925,320      |                           |
| Mapped near pre-miRNA         | <b>25,514</b> | <b>108,805</b>   | <b><i>P</i> value = 0</b> |

WT proportion by class

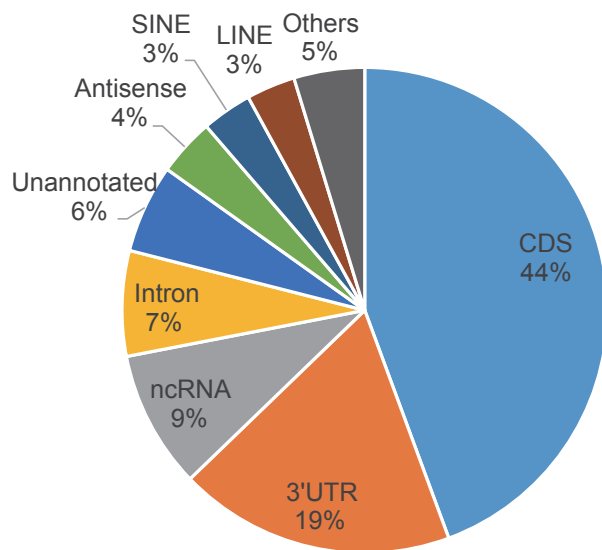

DroKO proportion by class

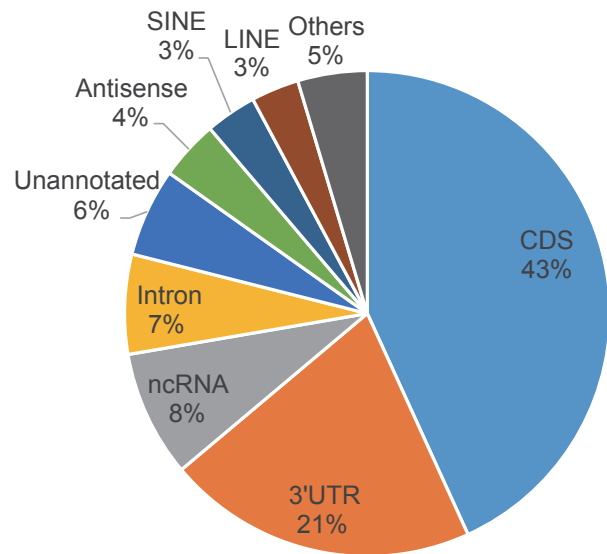

Supplement: 12864_2016_3252_MOESM2_ESM.pdf [file 12864_2016_3252_MOESM2_ESM.pdf]
