# Supplementary material for: Precise mapping of the transcription start sites of human microRNAs using DROSHA knockout cells
Source: PubMed Central journal article supplement (PMC5106785; doi:10.1186/s12864-016-3252-7), 2016-11-11

### A Pri-let-7i

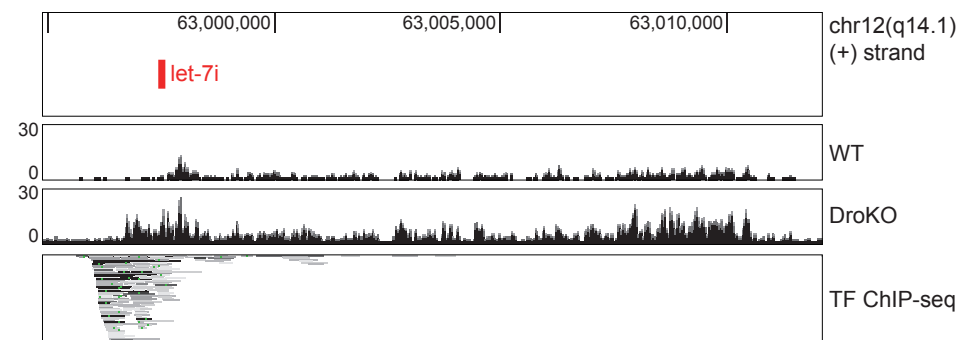

### B Pri-miR-183~96~182

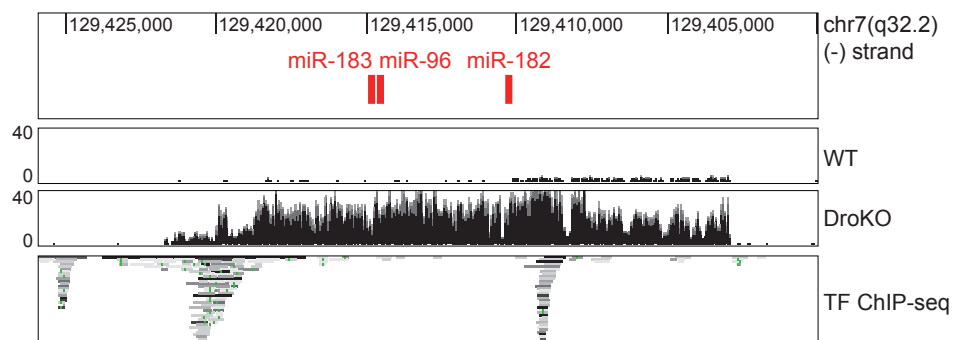

### C Pri-miR-30d~30b

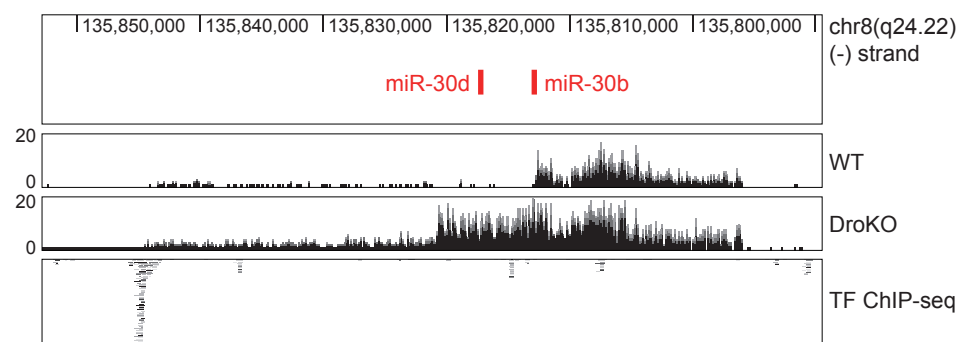

### D Pri-miR-374a~374b~421

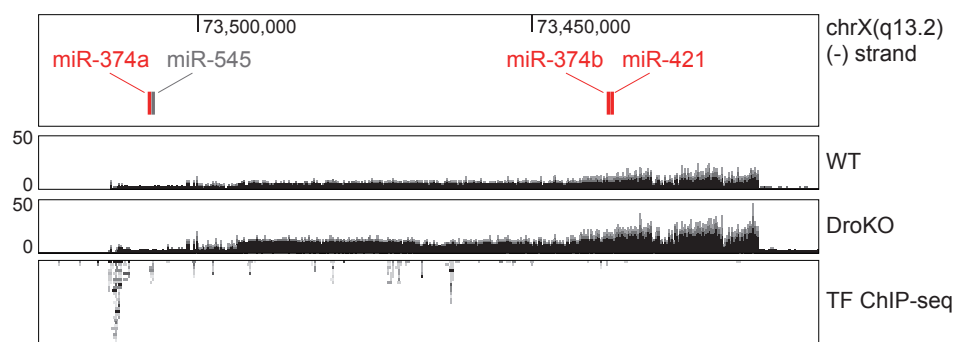

### E Pri-miR-222~221

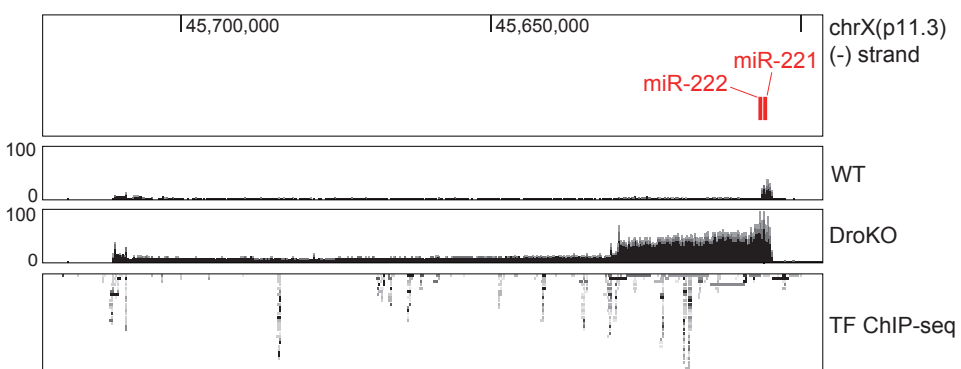

### F Pri-miR-31

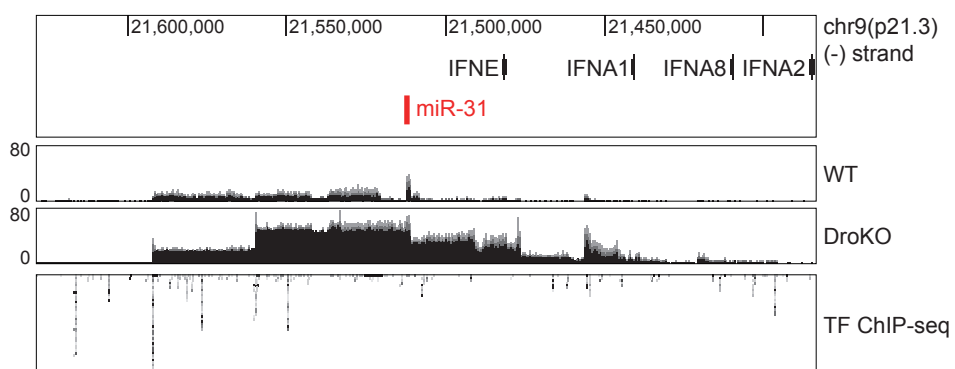

Supplement: 12864_2016_3252_MOESM3_ESM.pdf [file 12864_2016_3252_MOESM3_ESM.pdf]
